# Supplementary material for: Arabidopsis thaliana RESISTANCE TO FUSARIUM OXYSPORUM 2 Implicates Tyrosine-Sulfated Peptide Signaling in Susceptibility and Resistance to Root Infection
Source: PLoS Genet. 2013 May 23;9(5):e1003525. doi: 10.1371/journal.pgen.1003525 (PMC3662643; doi:10.1371/journal.pgen.1003525)
Supplement: Figure S4 — Alignment of PSY1R and RFO2-like RLP sequences at the carboxy-terminal ends of RLPs. Translated sequences of RFO2, RLP2 (RLP2c) and RLP2-T (RLP2t), encoding carboxy-terminal ends of RLPs, are aligned to the translated sequence of PSY1R in single-letter code. Amino acid residues that are identical in >50 percent of sequences are highlighted by white type on black background. The amino acid position from the start codon is given for the leftmost residue, and asterisks are stop codons. A SpeI restriction site (5′-ACT-AGT-3′), which codes for the threonine (T) and serine (S) residues at the arrow, was introduced as a silent mutation into coding sequences for the creation of chimeric fusions among RLP and RLK genes. (PDF) [file pgen.1003525.s004.pdf]

Spel site  
↓

|        |     |                                                                                                           |
|--------|-----|-----------------------------------------------------------------------------------------------------------|
| PSY1R  | 649 | LTGLHFLSYFNVANNTLSGPIPTGTQFDTFPKANFEGNPLLCGGVLLTSCDP---TQHSTT-----KMGKGKVNRTLVLGLVLGLFFGVSLILVLLALLVLSKRR |
| RF02   | 653 | LTSLHYMSYFNVVNSLDGPIPTGSQFDTFPQANFKGNPLLCGGILLTSCKASTKLPATTINKADTEDEEELKFIFILGVATGFFVSYCFYWCFFARLDAFISK*  |
| RLP2c  | 644 | LTNLNFLSYFNVANNSLEGPIPSEGFQFDTFPKANFEGNPLLCGGVLLTSCKP---TRAKEN-----DELNRTFLMGIAIGYFLSFVSILVVRW*           |
| RLP2t  | 625 | LTSLHFM SYFNVANNTLEGTIPRGSLFDTFPKAYFEGNPLLCGGVLLTSCKAPSQPPVTST-----DEEDQELKRTFIIGVVI GFFVSYCFYWCFLARRWA*  |
| Domain |     | C   D   E   F   G                                                                                         |
