# Supplementary material for: Arabidopsis thaliana RESISTANCE TO FUSARIUM OXYSPORUM 2 Implicates Tyrosine-Sulfated Peptide Signaling in Susceptibility and Resistance to Root Infection
Source: PubMed Central journal article supplement (PMC3662643; doi:10.1371/journal.pgen.1003525), 2013-05-23
Supplement: pgen.1003525.s002.pdf [file pgen.1003525.s002.pdf]

| Domain | Amino acid sequence                                              | Len | Comment          |
|--------|------------------------------------------------------------------|-----|------------------|
| A      | MIGILLQCVLFIISVLSIAVSEA                                          | 22  | Signal peptide   |
| B      | LCNSQDRESLLWFSGNVSSSVSPLNWNPSIDCCSWEGI                           | 40  | N-cap            |
| C      | DDSPDSHITAIISLPFRALYG KLP                                        | 23  | LRR1             |
|        | LSVLR <del>L</del> H <del>H</del> LSQLNLSHNRLSG HLP              | 24  | LRR2             |
|        | SGFLSALDQ <del>L</del> KVLDLSYNSLDG ELP                          | 25  | LRR3             |
|        | VEQTFRNGSNRCFPIRIVDLSSNFLQGEILP                                  | 31  | LRR4             |
|        | SSIFMQGTFDLISFNVSKN <del>S</del> FTG SIP                         | 26  | LRR5             |
|        | SFMCKSSPQLSKLDFSYNDFTG NIP                                       | 25  | LRR6             |
|        | QGLGRCLKLSV <del>L</del> QAGFNNISG EIP                           | 24  | LRR7             |
|        | SDIYNLSELEQLFLPVNHLSG KIN                                        | 24  | LRR8             |
|        | DDITHLTKLKSLELYSNHLGG EIP                                        | 24  | LRR9             |
|        | MDIGQLSRLQSLQLHINNITG TVP                                        | 24  | LRR10            |
|        | PSLANCTNLVKLNRLNRLEG TLS                                         | 24  | LRR11            |
|        | ELDFSRFQSLSIDLGNN <del>S</del> FSG DFP                           | 25  | LRR12            |
|        | WRVH <del>S</del> CKSLSAMRFASNKLTGQISP                           | 25  | LRR13            |
|        | HVLELESLSISLSLSDNKLM NIT                                         | 22  | LRR14            |
|        | GALGILQGCRNLSTLLIGKNFYNE TFP                                     | 27  | LRR15            |
|        | SDKDLISSDGFPNLQIFASGGGSLRG EIP                                   | 29  | LRR16            |
|        | AWLIK <del>L</del> KS <del>L</del> AVIDL <del>S</del> HNQLVG SIP | 24  | LRR17            |
|        | GWLGT <del>F</del> PHLFYIDLSENLLSG ELP                           | 24  | LRR18            |
|        | KDLFQLKALM                                                       | 10  | LRR19            |
|        | SQKAYDATERNYLKLPV <del>F</del> VSPNNVTTHQQYNQLFSLPP              | 38  | loop out         |
|        | GIYIRRN <del>N</del> LKG SIP                                     | 14  | LRR19            |
|        | IEVGQLKVLHVLELSHNYLSG IIP                                        | 24  | LRR20            |
|        | HELSK <del>L</del> TS <del>L</del> ERLDLSNHL <del>S</del> G RIP  | 24  | LRR21            |
|        | WSL <del>T</del> SLHYMSYFN <del>V</del> VNNSLDG PIP              | 24  | LRR22            |
|        | TGSQ <del>F</del> DT <del>F</del> PQANFKGNPLLCGGIL               | 24  | LRR23            |
| D      | LTSCKASTKLPATTTNKA                                               | 18  | C-cap            |
| E      | DTEDEEELK                                                        | 9   | Acidic           |
| F      | FIFILGVATGFFVSYCFYWCFE                                           | 22  | Transmembrane    |
| G      | ARLDAFISK                                                        | 9   | Cytoplasmic tail |
