# Supplementary material for: Arabidopsis thaliana RESISTANCE TO FUSARIUM OXYSPORUM 2 Implicates Tyrosine-Sulfated Peptide Signaling in Susceptibility and Resistance to Root Infection
Source: PubMed Central journal article supplement (PMC3662643; doi:10.1371/journal.pgen.1003525), 2013-05-23
Supplement: pgen.1003525.s003.pdf [file pgen.1003525.s003.pdf]

|       |     |                                                                                                       |
|-------|-----|-------------------------------------------------------------------------------------------------------|
| PSY1R | 94  | VTSIILSSRGLSGNLPSSVLDLQRLSRLDLSHNRLSGPLPPGFLSALDQLLVLDLSYNSFKGELPLQQSFGNGSNGIFPIQTVDLSSNLEGEILSSSVF   |
| RF02  | 98  | ITAIISLPFRALYGKLPISVLRHLHLSQLNLSHNRLSGHLPSGFLSALDQLKVLDSLNSLDGELPVEQTFRNGSNRCFPIRIVDLSSNFLQGEILPSSIF  |
| RLP2c | 92  | VTVISLPSRGLSGTLASSVQNIHRLSRLDLSYNRLSGPLPPGFSTLDQLMILNLSYNSFNGELPLEQAQFGNESNRFVSTQTLDLSSNLEGEILRSSVY   |
| RLP2t | 70  | VTTISLPSRGLSGTLTSSLQNLHRLSRLDLSYNHLSGPLQVLFSTLNQLMVLNLSYNSFNGELPLEQAQFGNESNRFVSTQTLDLSSNLLQQLRSSVY    |
| PSKR1 | 78  | VIRLELGNKLSGKLSSESLGKLEIRVNLNLSRNFIKDSIPLSIFN-LKNLQTLDLSSNDLSGGIPTSIINLP-----                         |
| PSY1R | 194 | LQGAFNLTSFNVSNNSTFTGSIPIFMCASPQLTKLDFSYNDFSGDLSQELSRCRSLSVLRAGFNLSGGEIPKEIYNLPELEQLFLPVNRLSGKIDNGITR  |
| RF02  | 198 | MQGTFDLTSFNVSNNSTFTGSIPIFMCSSPQLSKLDFSYNDFTGNIPOQLGRCLKLSVLQAGFNLSGGEIPSDIYNLSELEQLFLPVNHLSGKIDNDITR  |
| RLP2c | 192 | LQGTINLTSFNVSNNSTFTGPIPIFMCSSPQLSKLDFSYNDFSGHISQELGRCLRLTVLQAGFNLSGGEIPSEIYNLSELEQLFLPANQLTGKIDNNITR  |
| RLP2t | 170 | LLGAINLTSFNVSNNSTFTGPIPIFMCSSPQLSKLDFSYNDFSDHISQELSRCLGLRVLRAFNLSGGEIPSEIYNLSELEQLFLPVNRLSGKIDDDITR   |
| PSKR1 | 148 | -----ALQSFDLSSNKFNGLPSHTCHNSTQIRVVKLAVNYFAGNFTSGFGKCVLLEHLCLGMNDLTGNIPEDLFHLKRLNLLGIQENRLSGLSREIRN    |
| PSY1R | 294 | LTKLTLELYSNHIEGEIPKDIGKLSKLSLQLHVNNLMGSIPIVSLANCTKLVKLNLRVNQLGGTL SAIDFSRFQSL SILDGNNSTGEPSTVYSCKM    |
| RF02  | 298 | LTKLKSLELYSNHLEGEIPMDIGLSRLQSLQLHINNITGTVPLSLANCTNLVKLNLRNLRLGTLSELDFSRFQSL SILDGNNSTGDFPWRVHSCKS     |
| RLP2c | 292 | LRKLTSLALYSNHLEGEIPMDIGNLSSLRSLQLHINNITGTVPLSLANCTKLVKLNLRVNQLGGGLTELEFSQLQSLKVLDLGNNSTGALPKDFSCKS    |
| RLP2t | 270 | LSKLTTLDLYFNHLEGDIPVIGKLSLRLSLQLHINNITGSIPLSLANCTNLVKLNLRVNHLGGSLTELEDFSRFQSLRILDLGNNSTGDFPKVYSCKS    |
| PSKR1 | 243 | LSSLVRLDVSWNLFSGEIPDVFDEL PQLKFFLGQTNGFIGGIPKSLANSPSLNLLNLRNNSLSG-RLMLNCTAMIALNSLDLGTNRFNGLRLENLPDCKR |
| PSY1R | 394 | MTAMRFAGNKLTGQISPQVLELESLSFFTFSDNKMTNLTGALSILQGCKKSTLIMAKNFYDETVPSPKDFLRSDFPSPLOIFGIGACRLTGEIPAWLIK   |
| RF02  | 398 | LSAMRFASNKLTGQISPQVLELESLSLSDNKLMNITGALGILQGCRLSTLLIGKNFYNETFSPDKDLISSDGFPLQIFASGGSGLRGEIPAWLIK       |
| RLP2c | 392 | LTAIRFAGNKLTGQISPQVLELESLSFMGLSDNKLTNITGALSILQGCRLSTLLAKNFYDETVPSPKEDFLSPDGFPLRIFGVGACRLRGEIPAWLIN    |
| RLP2t | 370 | LTAIRFAGNKLTGQISPQVLELESLSFMSFSDNKLTNITGALSILQGCRLSTLLIANNFYDETVPINEDFVAPDGFPLQIFGIGGSRLKGEIPAWLIK    |
| PSKR1 | 342 | LKNVNLARNTFHQVPEPESKFNESLSYFSLNSSLANISSALGILQHCNLTTLVLTLLNFHGEALPDD-----SSLHFEKLKVLVVANCRLTGSMRRLSS   |
| PSY1R | 494 | LQRVEVMDLSMNRVGTIPGWLGTLPDLFYLDLSDNFLTGELPKELFQLRALMSQKAYDATERNYLELPVFNPNVTTNQYQNLSSLPPTIYIKRNNL      |
| RF02  | 498 | LKSLAVTDLSENQLVGSIPGWLGTLPPLFYLDLSENLSGELPKDLFQLKALMSQKAYDATERNYLLPVFVSPNNVTTNQYQNLFSLPPGIYIRRNNL     |
| RLP2c | 492 | LNKVEVMDLSMNRVGSIPGWLGTLPDLFYLDLSDNLTGELPKELFQLRALMSQK---ITENNYLELPITFLNPNNVTTNQYQNLKLYSFPPTIYIRRNNL  |
| RLP2t | 470 | IKSLEVLDSLNRFEGLIPGWLGTLPNLFYLDLSDNLSGELPKELFHLRALMSQKAYDATERNYLELPVFNPNVTTNQYQNLSSLPPTIYIRRNNL       |
| PSKR1 | 438 | SNELQLLDLSWNLTGAIPSWIGDFKALFYLDLSNNSFTGETPKSLTKLESLSRN--ISVNEPSPDFPFMKNRESARALQYQNIIFGFPPTIELGHNNL    |
| PSY1R | 594 | TGTIPVEVGQLKVLHILELLGNNFSGSIPDELSNLTNLERDLSDNNLSGRIPWSLTGLHFLSYFNVANNTLSGPIPTGTQFDTFPKANFEGNPLCGGV    |
| RF02  | 598 | KGSIPTEVGQLKVLHVLELHSHNYLSGTEIPHLSKLTSLERDLSDNNHLSGRIPWSLTHLYMSYFNVVNNSLDGPPIPTGSQFDTFPQANFKGNPLCGGI  |
| RLP2c | 589 | TGSIPVEVGQLKVLHILELLGNNLSGSIPELSNLTNLERDLSDNNLSGSIIPWSLTNLFHLSYFNVANNTLEGPPISEGFQFDTFPKANFEGNPLCGGV   |
| RLP2t | 570 | TGSIPVEVGQLKVTIHVLELHSHNYLSGTEIPHLSNLTNLERDLSDNNLSGRIPWSLTHLYMSYFNVANNTLEGTIPRGSQFDTFPKAYFEGNPLCGGV   |
| PSKR1 | 536 | SGPIWEFENLKKLHVFDLKWNALSGSIPSSLSGMTSLEALDLSNRLSGSIPVSLQQLSFLSKFSVAYNNLSGVIPSGGFQTFPNSSESN-HLCGEH      |
