# Supplementary material for: Arabidopsis thaliana RESISTANCE TO FUSARIUM OXYSPORUM 2 Implicates Tyrosine-Sulfated Peptide Signaling in Susceptibility and Resistance to Root Infection
Source: PubMed Central journal article supplement (PMC3662643; doi:10.1371/journal.pgen.1003525), 2013-05-23
Supplement: pgen.1003525.s005.pdf [file pgen.1003525.s005.pdf]

A

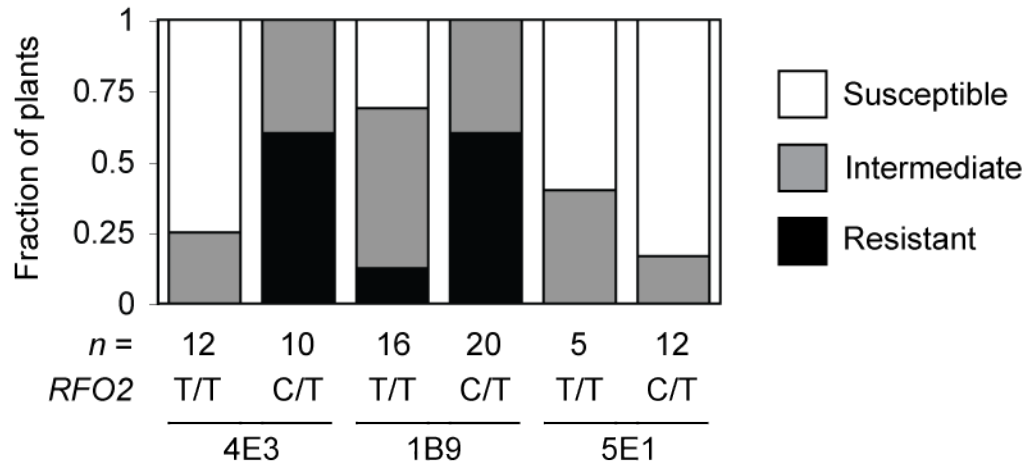

B

|      | F2H15 | F11A6 | F28G4 | F20D23 | F17F16 | Rfo2 |
|------|-------|-------|-------|--------|--------|------|
| 4E3  | T     | T     | X     | C      | C      | +    |
| 5E1  | C     | X     | T     | T      | T      | +    |
| 1B9  | C     | C     | C     | C      | X      | +    |
| ORFs | 39    | 19    | 36    | 13     |        |      |
