# Supplementary material for: Arabidopsis thaliana RESISTANCE TO FUSARIUM OXYSPORUM 2 Implicates Tyrosine-Sulfated Peptide Signaling in Susceptibility and Resistance to Root Infection
Source: PubMed Central journal article supplement (PMC3662643; doi:10.1371/journal.pgen.1003525), 2013-05-23
Supplement: pgen.1003525.s008.pdf [file pgen.1003525.s008.pdf]

**Table S2. PCR Primers and products for sequencing *RFO2* in Ty-0**

| # <sup>a</sup> | Primer   | Oligonucleotide sequence                       | Nucl. <sup>b</sup> | Length <sup>c</sup> | Overlap <sup>d</sup> |
|----------------|----------|------------------------------------------------|--------------------|---------------------|----------------------|
| 1              | 230RP    | 5'-tcgtggatgcaaccagaaact-3'                    | < 0 <sup>e</sup>   | > 1,900             | 508                  |
|                | 235stopR | 5'-aaaactgcagagctcgagcgtaatcgtcgtgatctgtgta-3' | 1,900              |                     |                      |
| 2              | 230CF1   | 5'-tcgttactcttgataagctcgttga-3'                | 1,392              | 2,648               | 360                  |
|                | 250MF    | 5'-tttcggagctcgagcaactct-3'                    | 4,040              |                     |                      |
| 3              | 240MR2   | 5'-cttggtgcctgcaaactgat-3'                     | 3,680              | 3,144               | 480                  |
|                | 250NF1   | 5'-catctgtactgtccaccaagcg-3'                   | 6,824              |                     |                      |
| 4              | 250NR3   | 5'-ctgctgcagctcttatggctc-3'                    | 6,344              | > 1,967             |                      |
|                | 260R1    | 5'-ggccaagcctaccaagctaaa-3'                    | > 8,311            |                     |                      |

<sup>a</sup> Designation of PCR-amplified DNA product

<sup>b</sup> Nucleotide in Ty-0 DNA, Genbank accession HQ141412, at 3' end of primer

<sup>c</sup> Length of PCR-amplified DNA product from Ty-0 in basepairs

<sup>d</sup> Length of DNA sequence overlap between DNA fragments (above and below)

<sup>e</sup> Primer anneals to sequence that is adjacent to sequence in Genbank accession HQ141412.
