# Supplementary material for: Arabidopsis thaliana RESISTANCE TO FUSARIUM OXYSPORUM 2 Implicates Tyrosine-Sulfated Peptide Signaling in Susceptibility and Resistance to Root Infection
Source: PubMed Central journal article supplement (PMC3662643; doi:10.1371/journal.pgen.1003525), 2013-05-23
Supplement: pgen.1003525.s010.pdf [file pgen.1003525.s010.pdf]

**Table S4. Homozygous T-DNA insertion lines in *RFO2* genetic interval**

| ABRC order number               | TAIR10 gene      |
|---------------------------------|------------------|
| SALK_001977C                    | At1g16890        |
| SALK_009736C                    | At1g17130        |
| SALK_009815C                    | At1g16980        |
| SALK_010091C                    | At1g16930        |
| SALK_014524C                    | At1g17200        |
| SALK_019569C                    | At1g17260        |
| SALK_025224C                    | At1g17480        |
| SALK_037965C                    | At1g17495        |
| SALK_042510C                    | At1g17430        |
| <b>SALK_049366C<sup>a</sup></b> | <b>At1g17240</b> |
| <b>SALK_051677C</b>             | <b>At1g17250</b> |
| SALK_053775C                    | At1g17380        |
| SALK_066856C                    | At1g17110        |
| SALK_072749C                    | At1g17410        |
| SALK_075228C                    | At1g17500        |
| SALK_080117C                    | At1g16900        |
| SALK_091444C                    | At1g17030        |
| <b>SALK_097514C</b>             | <b>At1g17230</b> |
| SALK_104566C                    | At1g17330        |
| SALK_104663C                    | At1g17080        |
| SALK_107662C                    | At1g17290        |
| SALK_112785C                    | At1g17345        |
| SALK_120416C                    | At1g17060        |
| SALK_123114C                    | At1g16970        |
| SALK_126802C                    | At1g16940        |
| SALK_127663C                    | At1g17100        |
| SALK_130749C                    | At1g17150        |
| SALK_132293C                    | At1g17440        |
| SALK_137479C                    | At1g17160        |
| SALK_147830C                    | At1g17420        |

<sup>a</sup> Salk lines in bold have insertions in the *RFO2* region as defined by common sequence in Kpn1.2 and Sal1.2 genomic subclones.
