# Supplementary material for: Arabidopsis thaliana RESISTANCE TO FUSARIUM OXYSPORUM 2 Implicates Tyrosine-Sulfated Peptide Signaling in Susceptibility and Resistance to Root Infection
Source: PubMed Central journal article supplement (PMC3662643; doi:10.1371/journal.pgen.1003525), 2013-05-23
Supplement: pgen.1003525.s011.pdf [file pgen.1003525.s011.pdf]

**Table S5. PCR primers for dominant multiplex PCR markers**

| Marker | Primer   | Gene <sup>a</sup> | Oligonucleotide sequence            | Chr. <sup>b</sup> | Nucleotide <sup>c</sup> |
|--------|----------|-------------------|-------------------------------------|-------------------|-------------------------|
| CHR1.3 | CHR1.3-F | <i>RFO2</i>       | 5'-ttaaatacaggctggccctaatagccttt-3' | 1                 | 7,969,890               |
|        | CHR1.3-R |                   | 5'-gtggattttgcagtgctagttccctca-3'   | 1                 | 7,970,182               |
| CHR1.9 | CHR1.9-F | <i>RFO1</i>       | 5'-gaaaaggagatgccgtttcgtccctac-3'   | 1                 | 30,425,560              |
|        | CHR1.9-R |                   | 5'-caaagtcggtttcgattgggtttgt-3'     | 1                 | 30,426,060              |
| CHR3.3 | CHR3.3-F | <i>RFO3</i>       | 5'-tgatggagtgaaaaagcatgtccattg-3'   | 3                 | 5,440,460               |
|        | CHR3.3-R |                   | 5'-ctgaaagtataaccaaagcgcgagcaa-3'   | 3                 | 5,440,672               |
| CHR3.8 | CHR3.8-F | none              | 5'-gtattggcgactccaaatcccattcac-3'   | 3                 | 22558313                |
|        | CHR3.8-R |                   | 5'-gtcctgtgatagcctcaccgcttct-3'     | 3                 | 22558677                |

<sup>a</sup> *RFO* QTL is linked to marker CHR*x.x*.

<sup>b</sup> Abbreviation for chromosome number

<sup>c</sup> Position of most 5' nucleotide in the Arabidopsis TAIR10 reference genome. Size of PCR product is the difference between nucleotide positions of the primer pair.
